# Supplementary material
Source: Springer Nature journal article supplement (https://www.springermedizin.de/resource/supplementary/12943_2010_800_MOESM2_ESM.pdf/9554874)

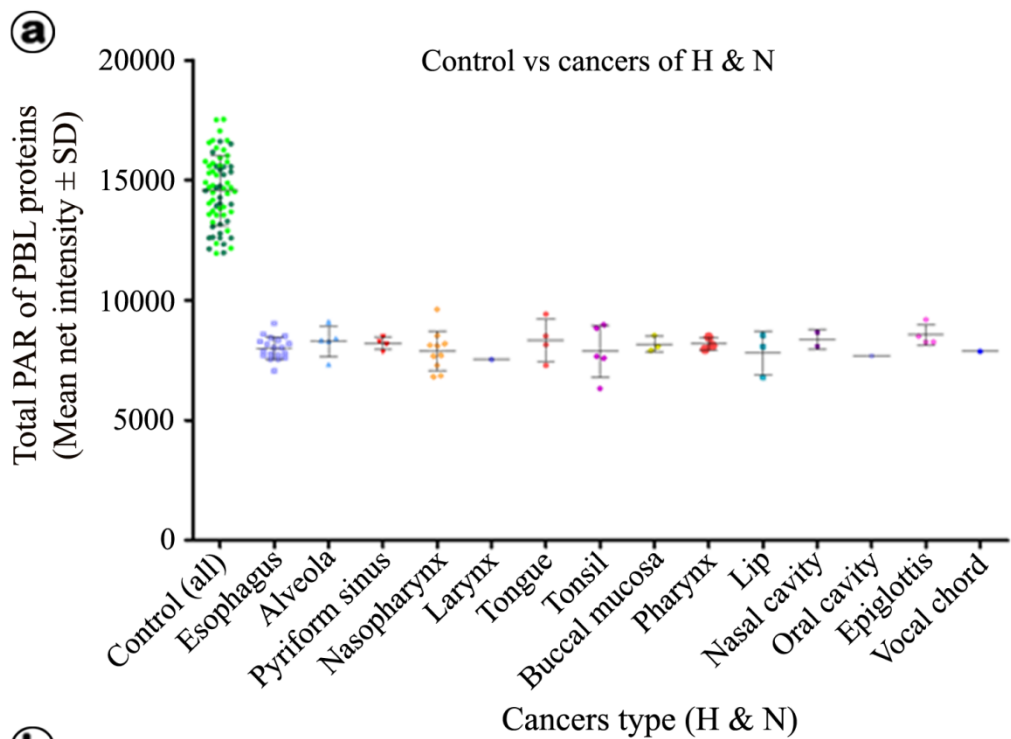

| Group                  | PAR of PBL proteins<br>mean $\pm$ SD | p*      |
|------------------------|--------------------------------------|---------|
| Control (all)          | 14573 $\pm$ 1452                     |         |
| Control (females only) | 14125 $\pm$ 1431                     |         |
| Cancers of head & neck | 8059 $\pm$ 304                       | <0.0001 |
| Cancer of breast       | 7594 $\pm$ 852                       | <0.0001 |
| Cancer of cervix       | 8139 $\pm$ 799                       | <0.0001 |

\* Unpaired t-test with Welch correction

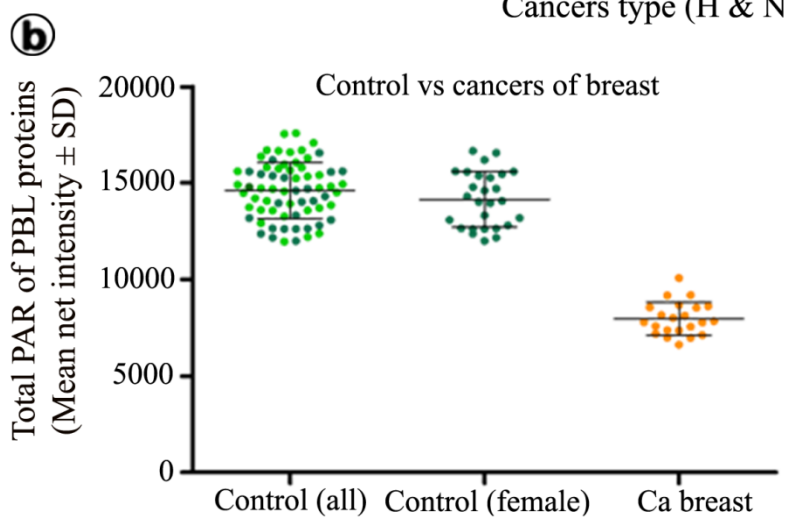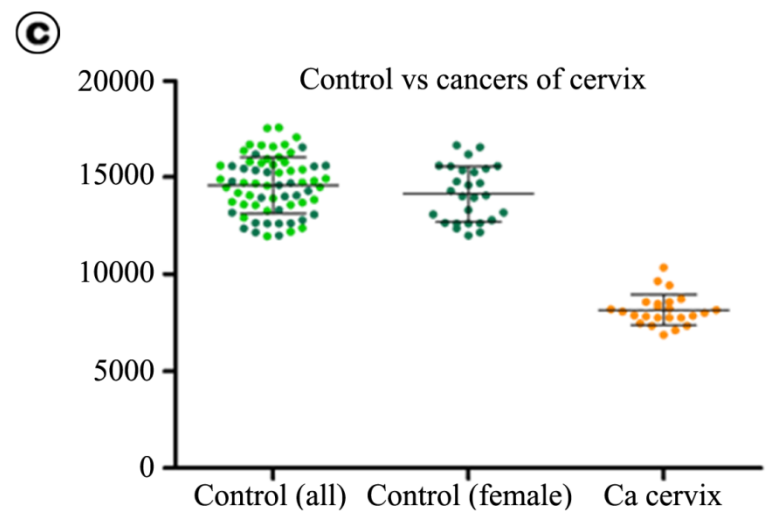

Supplement: MOESM2 [file 9554874]
